# Supplementary material for: Structure modulation from unstable to stable MOFs by regulating secondary N-donor ligands
Source: Royal Society of Chemistry journal article supplement (doi:10.1039/c8dt02858c), 2018-01-01
Supplement: c8dt02858c1.pdf [file c8dt02858c1.pdf]

## Supporting Information

### Structure modulation from unstable to stable MOFs by regulating secondary N-donor ligands

Da-Shuai Zhang,<sup>a</sup> Yong-Zheng Zhang,<sup>a</sup> Jun Gao,<sup>d</sup> Hui-Ling Liu,<sup>a,b</sup> Hui Hu,<sup>a</sup> Long-Long Geng,<sup>a</sup> Xiuling Zhang<sup>\*a,b</sup> and Yun-Wu Li<sup>\*c</sup>

#### 1. Synthesis and Structures.

##### Preparation of H<sub>2</sub>tmdb

8.56 g (0.03 mol) of 4,4'-((1*H*-1,2,4-triazol-1-yl)methylene)dibenzonitrile was charged into a three-necked flask equipped with a magnetic stir bar and 10% sodium hydroxide (50 mL) was added. The resulting mixture was stirred at reflux for 6 h (monitored by TLC). After cooling to ambient temperature, the reaction mixture was extracted with ethyl acetate. Then the water layer was acidified with concentrated hydrochloric acid, and a white precipitate formed which was filtered and washed with distilled water, and then further dried in vacuum. 9.21 g of 4,4'-((1*H*-1,2,4-triazol-1-yl)methylene)dibenzoic acid was obtained without further purification (Yield: 94.9%). <sup>1</sup>H NMR (DMSO-*d*<sub>6</sub>, 400 MHz)  $\delta$  13.06 (s, 2 H), 8.69 (s, 1 H), 8.12 (s, 1 H), 7.96 (d, *J* = 8.0 Hz, 4 H), 7.36 (d, *J* = 8.0 Hz, 4 H), 7.33 (s, 1 H); <sup>13</sup>C NMR (DMSO-*d*<sub>6</sub>, 100 MHz)  $\delta$  166.8, 152.1, 144.7, 143.0, 130.6, 129.6, 128.3, 64.6.

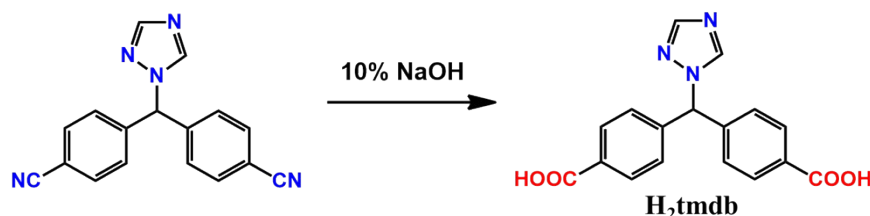

Scheme S1. Preparation procedure of H<sub>2</sub>tmdb ligand

##### Synthesis of the [Cd(tmdb)(DMA)]<sub>n</sub> (YZ-3)

A mixture of H<sub>2</sub>tmdb (16.1 mg, 0.05 mmol), Cd(NO<sub>3</sub>)<sub>2</sub>·4H<sub>2</sub>O (30.8 mg, 0.1 mmol), DMA (4 mL) and water (1 mL) was sealed in a 20 mL glass vial, which was then ultrasound-treated for 10 min and placed in a 100 °C oven for 96 h. Colorless block crystals were obtained through filtration, DMA washed and air dried (yield 60.3% based on Cd). Elemental analysis for C<sub>21</sub>H<sub>19</sub>N<sub>4</sub>O<sub>5</sub>Cd: calcd. (%): C 48.52, H 6.48, N 10.78; found (%): C 48.57, H 6.41, N 10.82.

##### Structure description of [Cd(tmdb)(DMA)]<sub>n</sub> (YZ-3)

X-ray diffraction analysis revealed that YZ-3 crystallizes in *C2/c* space group of monoclinic system with a two dimensional (2D) structure. As shown in Fig. S1a, the asymmetric unit of YZ-3 contains one crystallographic independent Cd<sup>2+</sup> ion, which is six-coordinated by four carboxylic O atoms from three different tmdb<sup>2-</sup> ligands, one O atom from DMA molecule and one N atom from another tmdb<sup>2-</sup> ligand. The Cd-O bonds are around 2.2050(3)-2.59(3) Å, Cd-N bond is 2.259(2) Å

and the  $\text{Cd}^{2+}$  ion centers based angles are around  $78.97(9)$ - $156.38(11)^\circ$ . In the structure of YZ-3,  $\text{tmdb}^{2-}$  links four  $\text{Cd}^{2+}$  ions in a  $\eta^1:\eta^1:\eta^1:\eta^1:\eta^1:\mu_4$  mode (Fig. S1b) and form a 2D layer structure along  $bc$  plane (Fig. S1c). Moreover, the coordination of solvent DMA molecules up and down the layers for restricting the dimension generation of structure.

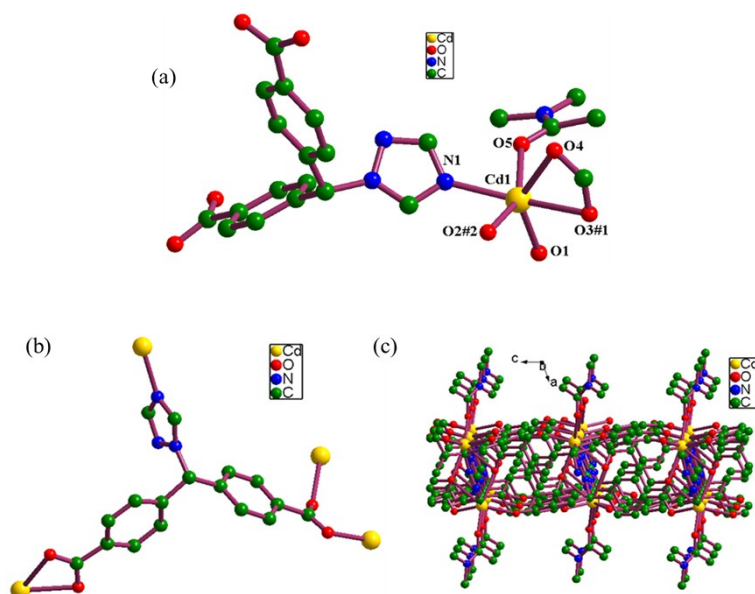

**Fig. S1.** Structures of YZ-3.

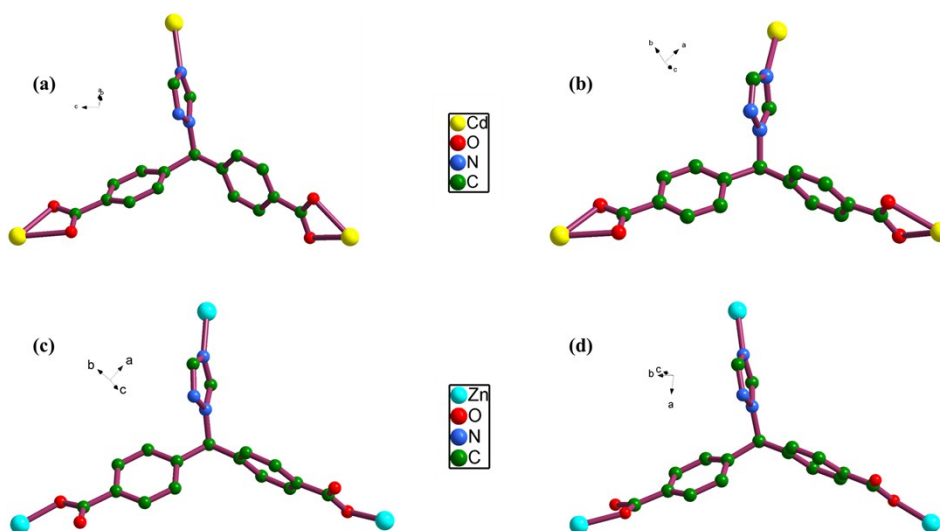

**Fig. S2.** Coordination modes of  $\text{H}_2\text{tmdb}$  ligand in YZ-7 (a), YZ-8 (b), YZ-9 (c) and YZ-10 (d).

**Table S1**

| Compound                                         | YZ-7                                                            | YZ-8                                                            | YZ-9                                                                           | YZ-10                                                                          |
|--------------------------------------------------|-----------------------------------------------------------------|-----------------------------------------------------------------|--------------------------------------------------------------------------------|--------------------------------------------------------------------------------|
| Empirical formula                                | C <sub>23</sub> H <sub>16</sub> CdN <sub>5</sub> O <sub>4</sub> | C <sub>24</sub> H <sub>18</sub> CdN <sub>5</sub> O <sub>4</sub> | C <sub>48</sub> H <sub>37</sub> N <sub>10</sub> O <sub>8</sub> Zn <sub>2</sub> | C <sub>45</sub> H <sub>36</sub> N <sub>10</sub> O <sub>8</sub> Zn <sub>2</sub> |
| Formula weight                                   | 538.81                                                          | 552.83                                                          | 1012.61                                                                        | 975.58                                                                         |
| Crystal system                                   | <i>monoclinic</i>                                               | <i>monoclinic</i>                                               | <i>triclinic</i>                                                               | <i>orthorhombic</i>                                                            |
| Space group                                      | <i>C2/c</i>                                                     | <i>P2/c</i>                                                     | <i>P-1</i>                                                                     | <i>P2<sub>1</sub>2<sub>1</sub>2</i>                                            |
| Unit cell dimensions                             |                                                                 |                                                                 |                                                                                |                                                                                |
| a (Å)                                            | 34.226(18)                                                      | 12.292(4)                                                       | 11.733(4)                                                                      | 17.8890(10)                                                                    |
| b (Å)                                            | 16.245(9)                                                       | 20.108(7)                                                       | 19.916(6)                                                                      | 22.857(2)                                                                      |
| c (Å)                                            | 14.643(8)                                                       | 19.807(7)                                                       | 20.326(7)                                                                      | 9.176(3)                                                                       |
| α (deg)                                          | 90                                                              | 90.000(6)                                                       | 95.447(6)                                                                      | 90                                                                             |
| β (deg)                                          | 99.029(10)                                                      | 104.488(6)                                                      | 102.611(5)                                                                     | 90                                                                             |
| γ (deg)                                          | 90                                                              | 90                                                              | 95.538(6)                                                                      | 90                                                                             |
| Volume (Å <sup>3</sup> )                         | 8041(8)                                                         | 4740(3)                                                         | 4580(3)                                                                        | 3752.2(13)                                                                     |
| Z                                                | 8                                                               | 4                                                               | 2                                                                              | 2                                                                              |
| Calculated density (g/cm <sup>3</sup> )          | 0.890                                                           | 0.775                                                           | 0.734                                                                          | 0.863                                                                          |
| F(000)                                           | 2152.0                                                          | 1108.0                                                          | 1038.0                                                                         | 1000.0                                                                         |
| θ range for data collection (°)                  | 3.822 to 49.67                                                  | 2.026 to 49.694                                                 | 2.068 to 56.668                                                                | 2.89 to 55.15                                                                  |
| Goodness-of-fit on <i>F</i> <sup>2</sup>         | 1.000                                                           | 0.956                                                           | 0.904                                                                          | 0.834                                                                          |
| Final R indices [I>2σ(I)]                        | R1 = 0.0455,<br>wR2 = 0.1164                                    | R1 = 0.0569,<br>wR2 = 0.1592                                    | R1 = 0.0511,<br>wR2 = 0.1242                                                   | R1 = 0.0420,<br>wR2 = 0.0877                                                   |
| R indices (all data)                             | R1 = 0.0848,<br>wR2 = 0.1319                                    | R1 = 0.0982,<br>wR2 = 0.1860                                    | R1 = 0.1284,<br>wR2 = 0.1478                                                   | R1 = 0.0728,<br>wR2 = 0.0946                                                   |
| Largest diff. peak and hole (e.Å <sup>-3</sup> ) | 0.56 and -0.38                                                  | 1.09 and -1.04                                                  | 0.35 and -0.49                                                                 | 0.25 and -0.16                                                                 |

**Table S2**

|               | YZ-7       |                          |
|---------------|------------|--------------------------|
| Cd1-O1#1      | 2.309(4)   | Cd1-O3(2) 2.411(4)       |
| Cd1-O4#2      | 2.301(4)   | Cd1-O2#1 2.404(4)        |
| Cd1-N3        | 2.270(5)   | Cd1-N4 2.249(4)          |
| O1#1-Cd1-O3#2 | 129.47(14) | O1#1-Cd1-O2#1 55.25(14)  |
| O4#2-Cd1-O1#1 | 90.13(15)  | O4#2-Cd1-O3#2 55.44(15)  |
| O4#2-Cd1-O2#1 | 100.33(16) | O2#1-Cd1-O3#2 152.15(15) |
| N3-Cd1-O1#1   | 88.41(16)  | N3-Cd1-O3#2 95.32(15)    |
| N3-Cd1-O4#2   | 138.42(17) | N3-Cd1-O2#1 112.52(15)   |
| N4-Cd1-O1#1   | 140.13(15) | N4-Cd1-O3#2 90.22(16)    |
| N4-Cd1-O4#2   | 114.67(17) | N4-Cd1-O2#1 88.50(16)    |

|                                                                                                                                        |            |               |            |
|----------------------------------------------------------------------------------------------------------------------------------------|------------|---------------|------------|
| N4-Cd1-N3                                                                                                                              | 91.69(18)  |               |            |
| Symmetry codes #1: 3/2-X, 1/2+Y, 3/2-Z; #2: 3/2-X, 1/2+Y, 1/2-Z; #3: 3/2-X, -1/2+Y, 3/2-Z; #4 3/2-X, -1/2+Y, 1/2-Z; #5: 1-X, 1-Y, 1-Z; |            |               |            |
| YZ-8                                                                                                                                   |            |               |            |
| Cd1-O1#1                                                                                                                               | 2.373(4)   | Cd1-O2#2      | 2.348(4)   |
| Cd1-O3                                                                                                                                 | 2.320(4)   | Cd1-O4        | 2.338(5)   |
| Cd1-N1                                                                                                                                 | 2.258(5)   | Cd1-N4        | 2.219(6)   |
| O2#2-Cd1-O1#1                                                                                                                          | 108.40(16) | O3-Cd1-O1#1   | 54.64(15)  |
| O3-Cd1-O2#2                                                                                                                            | 91.28(17)  | O3-Cd1-O4     | 98.48(17)  |
| O4-Cd1-O1#1                                                                                                                            | 150.58(18) | O4-Cd1-O2#2   | 55.34(14)  |
| N1-Cd1-O1#1                                                                                                                            | 95.80(18)  | N1-Cd1-O2#2   | 85.22(17)  |
| N1-Cd1-O3                                                                                                                              | 147.34(19) | N1-Cd1-O4     | 105.91(18) |
| N4-Cd1-O1#1                                                                                                                            | 97.3(2)    | N4-Cd1-O2#2   | 152.84(19) |
| N4-Cd1-O3                                                                                                                              | 96.7(2)    | N4-Cd1-O4     | 97.71(19)  |
| N4-Cd1-N1                                                                                                                              | 101.1(2)   |               |            |
| Symmetry codes #1: 1+X, +Y, +Z; #2: +X, -Y, -1/2+Z; #3: -1+X, +Y, +Z; #4 +X, -Y, 1/2+Z; #5: 1-X, 1-Y, 1-Z;                             |            |               |            |
| YZ-9                                                                                                                                   |            |               |            |
| Zn1-O3                                                                                                                                 | 2.036(2)   | Zn1-N24#1     | 2.036(2)   |
| Zn1-O1                                                                                                                                 | 1.959(2)   | Zn1-N1        | 2.061(3)   |
| Zn2-O6#2                                                                                                                               | 2.009(2)   | Zn2-O7        | 1.954(2)   |
| Zn2-N3                                                                                                                                 | 2.070(3)   | Zn2-N5        | 2.030(2)   |
| O3-Zn1-N1                                                                                                                              | 94.87(11)  | N24#1-Zn1-O3  | 109.75(10) |
| N24#1-Zn1-N1                                                                                                                           | 100.21(11) | O1-Zn1-O3     | 110.73(10) |
| O1-Zn1-N24#1                                                                                                                           | 127.18(12) | O1-Zn1-N1     | 108.61(12) |
| O6#2-Zn2-N3                                                                                                                            | 102.37(11) | O6#2-Zn2-N5   | 110.45(10) |
| O7-Zn2-O6#2                                                                                                                            | 109.98(10) | O7-Zn2-N3     | 104.89(11) |
| O7-Zn2-N5                                                                                                                              | 125.31(10) | N5-Zn2-N3     | 100.72(11) |
| Symmetry codes #1: -1+X, +Y, +Z; #2: -1+X, +Y, -1+Z; #3: 1+X, +Y, 1+Z; #4 1+X, +Y, +Z; #5: 1-X, 2-Y, 1-Z; #6: 1-X, -Y, 2-Z;            |            |               |            |
| YZ-10                                                                                                                                  |            |               |            |
| Zn1-N3#1                                                                                                                               | 2.011(3)   | Zn1-O3#2      | 1.929(3)   |
| Zn1-O1                                                                                                                                 | 1.968(3)   | Zn1-N4        | 2.016(5)   |
| N3#1-Zn1-N4                                                                                                                            | 110.91(14) | O3#2-Zn1-N3#1 | 108.19(13) |
| O3#2-Zn1-O1                                                                                                                            | 97.89(14)  | O3#2-Zn1-N4   | 108.07(17) |
| O1-Zn1-N3#1                                                                                                                            | 114.49(14) | O1-Zn1-N4     | 116.04(19) |
| Symmetry codes #1: 1/2+X, 3/2-Y, 2-Z; #2: 1/2-X, 1/2+Y, 1-Z; #3: -1/2+X, 3/2-Y, 2-Z; #4 1/2-X, -1/2+Y, 1-Z; #5: -X, 2-Y, +Z.           |            |               |            |

## 2. Characterization.

### IR spectra

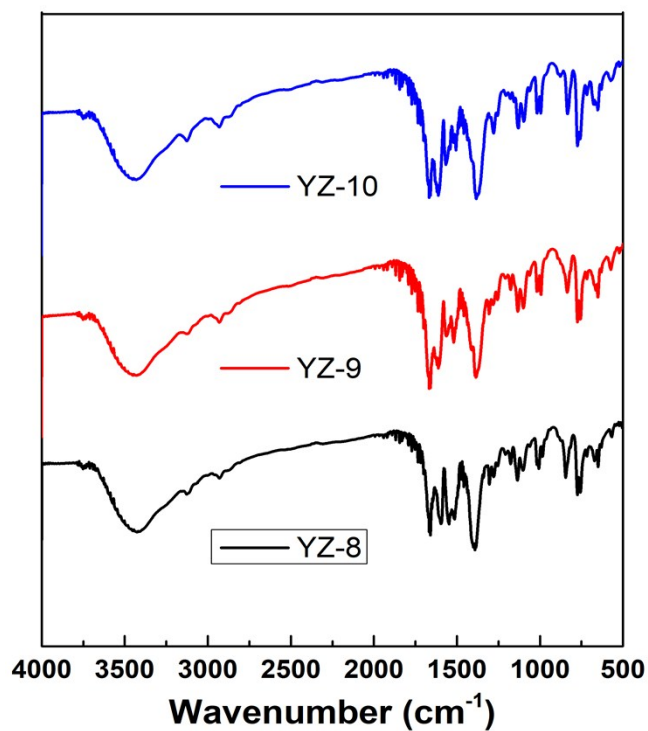

Fig. S3. IR spectrum of YZ-8–YZ-10

### PXRD

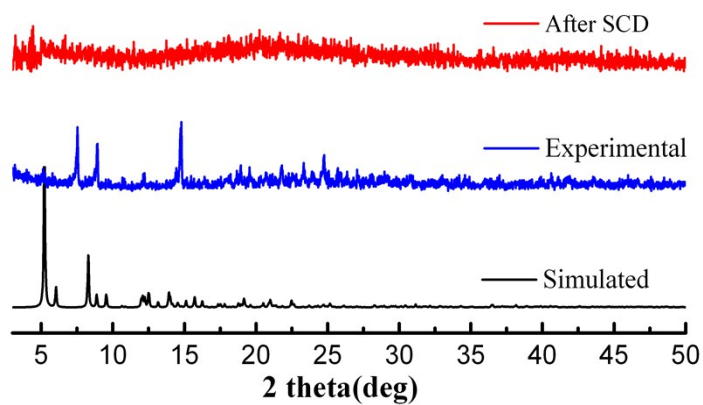

(a)

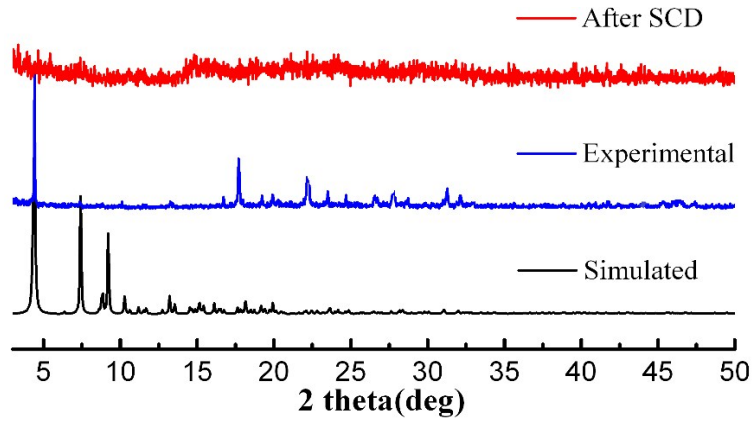

(b)

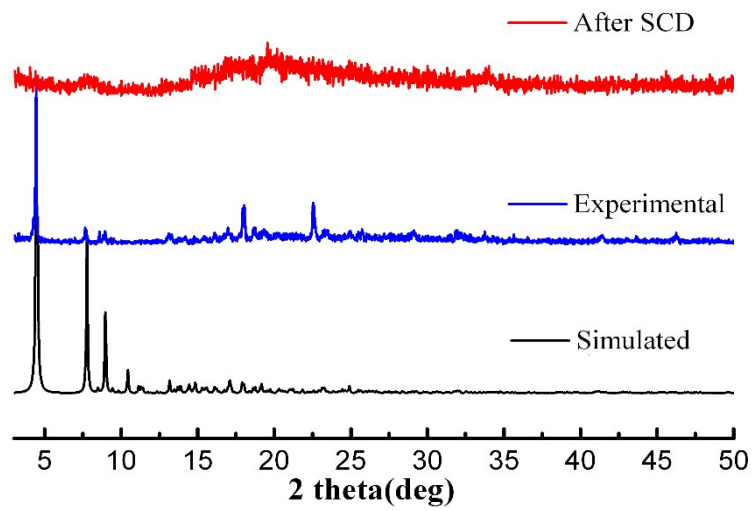

(c)

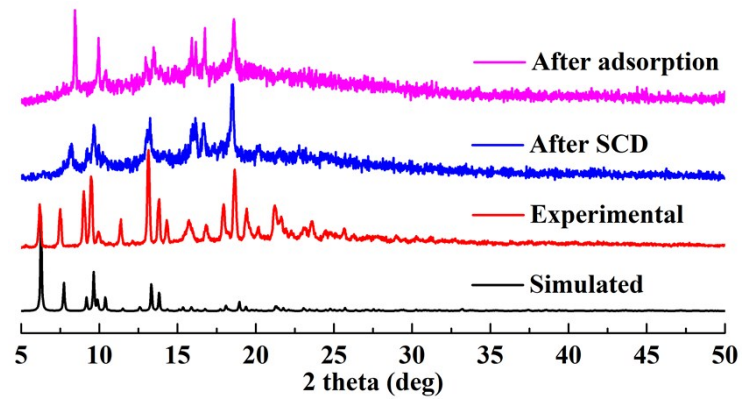

(d)

Fig. S4. PXRD patterns of YZ-7 (a), YZ-8 (b), YZ-9 (c) and YZ-10 (d).

### 3. Gas Adsorption Properties.

#### $Q_{st}$ Calculation

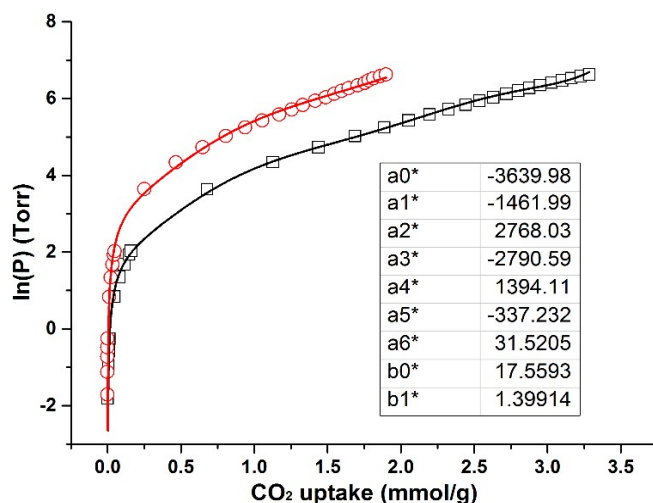

Fig. S5. The CO<sub>2</sub> isotherms at 273 K and 298 K (symbols) and the virial equation fits (lines) for YZ-10.

#### Calculation of Gas Uptake Selectivity

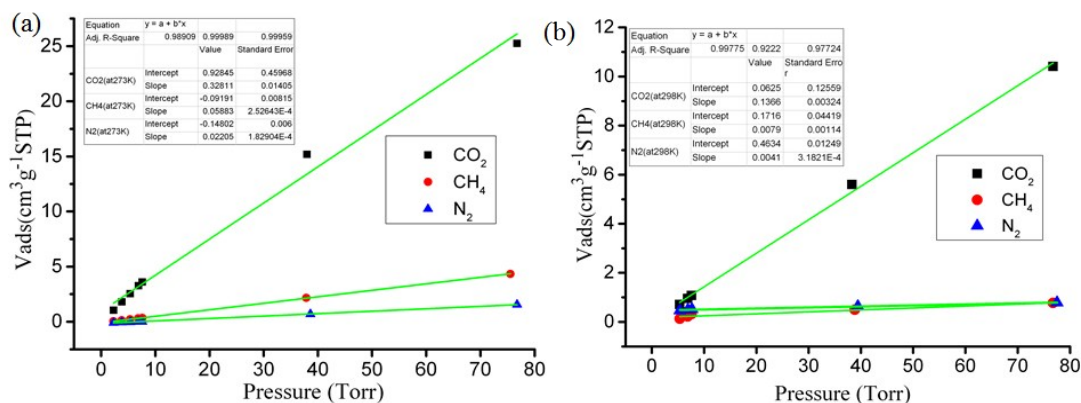

Fig. S6. The fitting initial slopes for CO<sub>2</sub>, CH<sub>4</sub>, N<sub>2</sub> at 273 K (a) and 298 K (b) for YZ-10.

#### Prediction of the Gases Adsorption Selectivity by IAST

IAST (ideal adsorption solution theory) was used to predict binary mixture adsorption from the experimental pure-gas isotherms. In order to perform the integrations required by IAST, the single component isotherms should be fitted by a proper model. In practice, several methods to do this are available. We found for this set of data that the dual-site Langmuir-Freundlich equation was successful in fitting the data.

$$q = \frac{q_{m,1} b_1 P^{1/n_1}}{1 + b_1 P^{1/n_1}} + \frac{q_{m,2} b_2 P^{1/n_2}}{1 + b_2 P^{1/n_2}}$$

Here,  $P$  is the pressure of the bulk gas at equilibrium with the adsorbed phase (kPa),  $q$  is the adsorbed amount per mass of adsorbent (mmol/g),  $q_{m,1}$  and  $q_{m,2}$  are the saturation capacities of sites 1 and 2 (mmol/g),  $b_1$  and  $b_2$  are the affinity coefficients of sites 1 and 2 (1/kPa), and  $n_1$  and  $n_2$  represent the deviations from an ideal homogeneous surface. The fitted parameters were then used to predict multicomponent adsorption with IAST.

The selectivity  $S_{A/B}$  in a binary mixture of components A and B is defined as  $(x_A/y_A) / (x_B/y_B)$ ,

where  $x_i$  and  $y_i$  are the mole fractions of component  $i$  ( $i = A, B$ ) in the adsorbed and bulk phases, respectively.

**Table S3.**

|                                                       | CO <sub>2</sub> | CH <sub>4</sub> | N <sub>2</sub> |
|-------------------------------------------------------|-----------------|-----------------|----------------|
| Kinetic diameter (Å)                                  | 3.3             | 3.8             | 3.6            |
| Quadrupole moment $10^{40} \theta$ (cm <sup>2</sup> ) | 13.4            | 0               | 4.7            |
| Dipole moment (D)                                     | 0               | 0               | 0              |
